# Supplementary material for: Post cross-linked ROS-responsive poly(β-amino ester)-plasmid polyplex NPs for gene therapy of EBV-associated nasopharyngeal carcinoma
Source: Royal Society of Chemistry journal article supplement (doi:10.1039/d3tb02926c), 2024-01-01
Supplement: d3tb02926c1.pdf [file d3tb02926c1.pdf]

## Supporting Information

### Post cross-linked ROS-responsive poly ( $\beta$ -amino ester)-plasmids polyplex NPs for gene therapy of EBV-associated nasopharyngeal carcinoma

Caiyan Yuan<sup>a,c,e</sup>, Shuangyan Chang<sup>b,e</sup>, Chong Zhang<sup>a,e</sup>, Dirong Dong<sup>b</sup>, Jiahui  
Ding<sup>a</sup>, Ali Reza Mahdavian<sup>d</sup>, Zheng Hu<sup>b</sup>, Lili Sun<sup>b,\*</sup>, Songwei Tan<sup>a,\*</sup>,

- a. School of Pharmacy, Tongji Medical College, Huazhong University of Science and Technology, Wuhan 430030, China. E-mail: Tansw@hust.edu.cn, tansongwei@gmail.com
- b. Department of Obstetrics and Gynecology, Zhongnan Hospital of Wuhan University, Donghu 169th Road, Wuchang District, Wuhan 430062, Hubei, China. E-mail: huzheng1998@163.com
- c. The first hospital of Nanchang, Nanchang 330008, China
- d. Polymer Science Department, Iran Polymer and Petrochemical Institute, Tehran 14967, Iran;

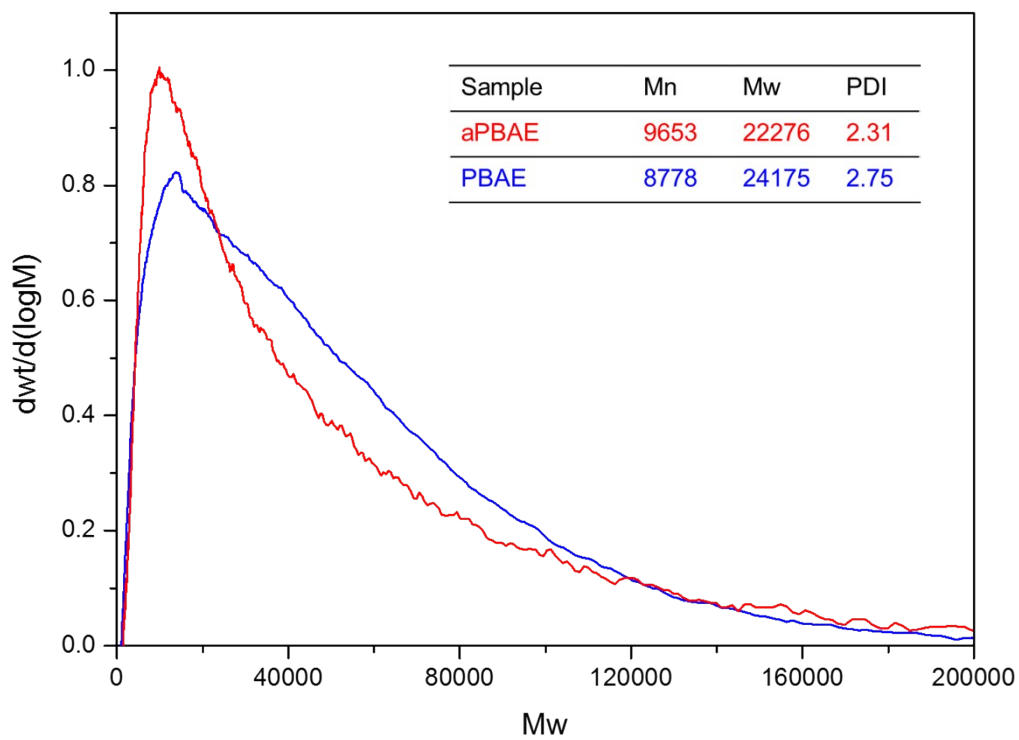

Fig S1. Gel Permeation Chromatography (GPC) results of aPBAE and PBAE.

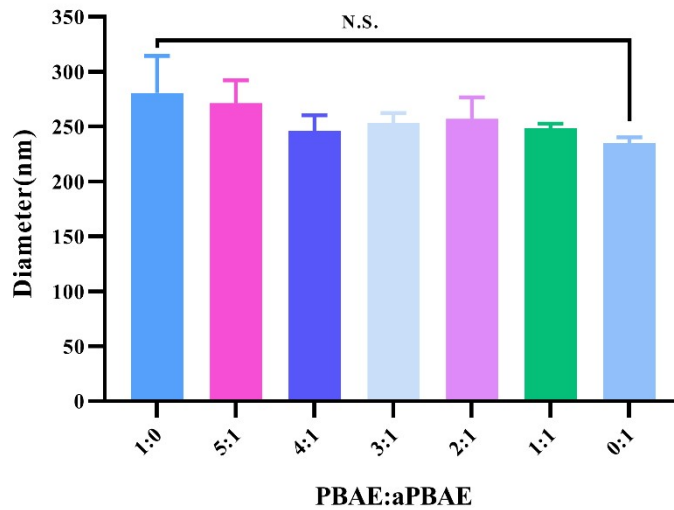

Fig. S2. Particles size of polyplex NPs at the different ratios between PBAE and aPBAE. N.S.: no significant difference.

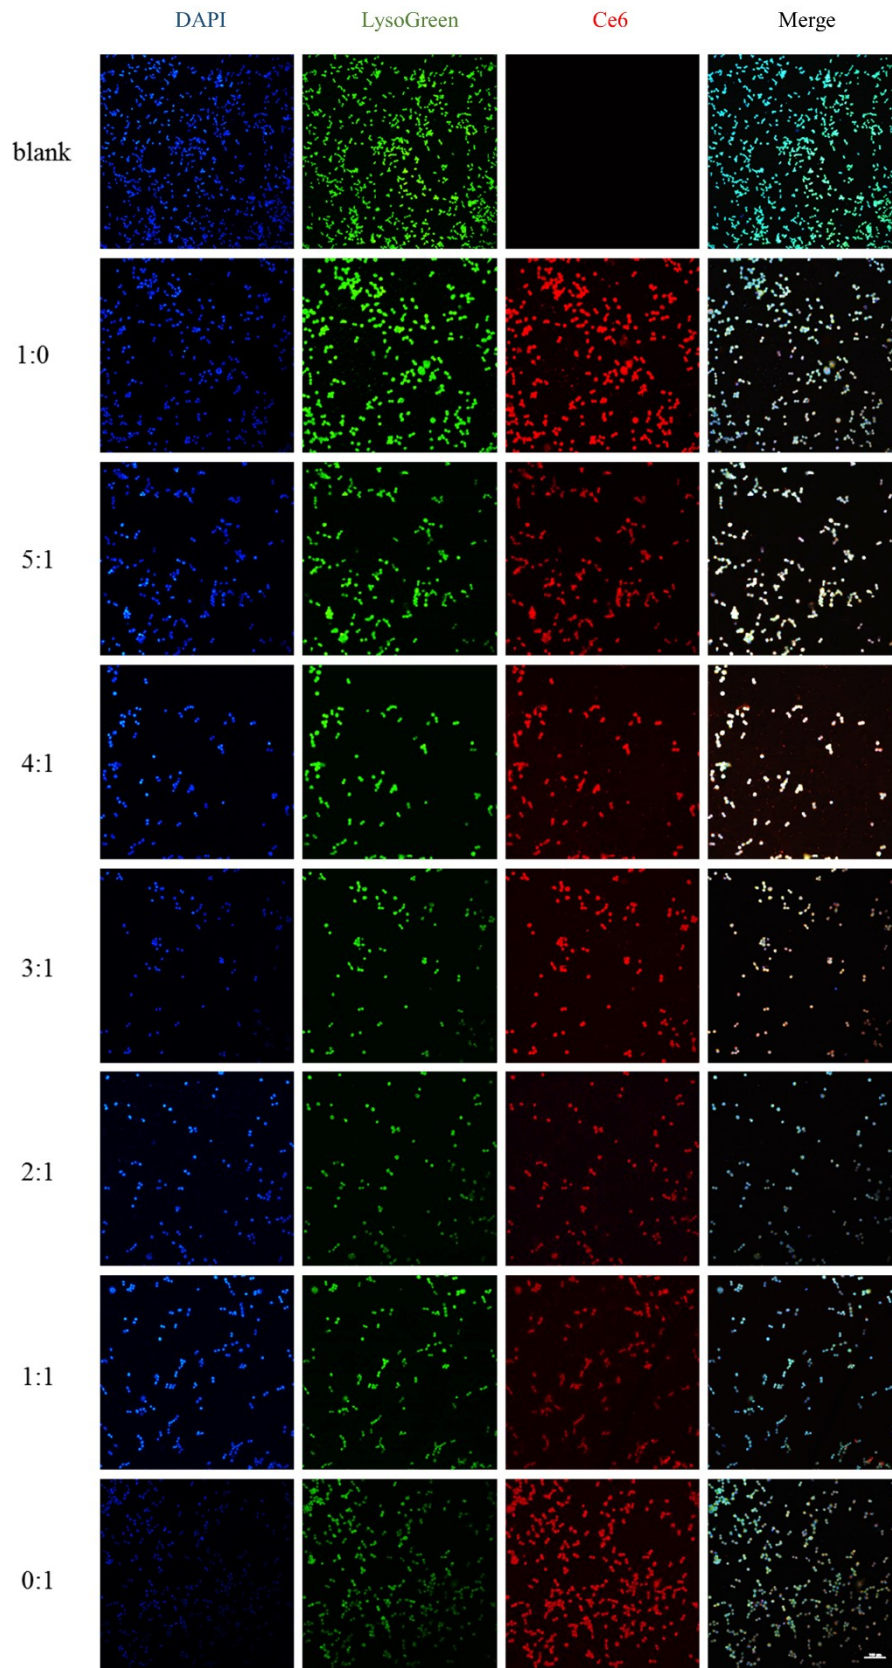

Fig. S3. Typical fluorescence microscopy images of intracellular uptake of C666-1 cells at the different ratios between PBAE and aPBAE at 2h (Scale bar, 100  $\mu$ m).

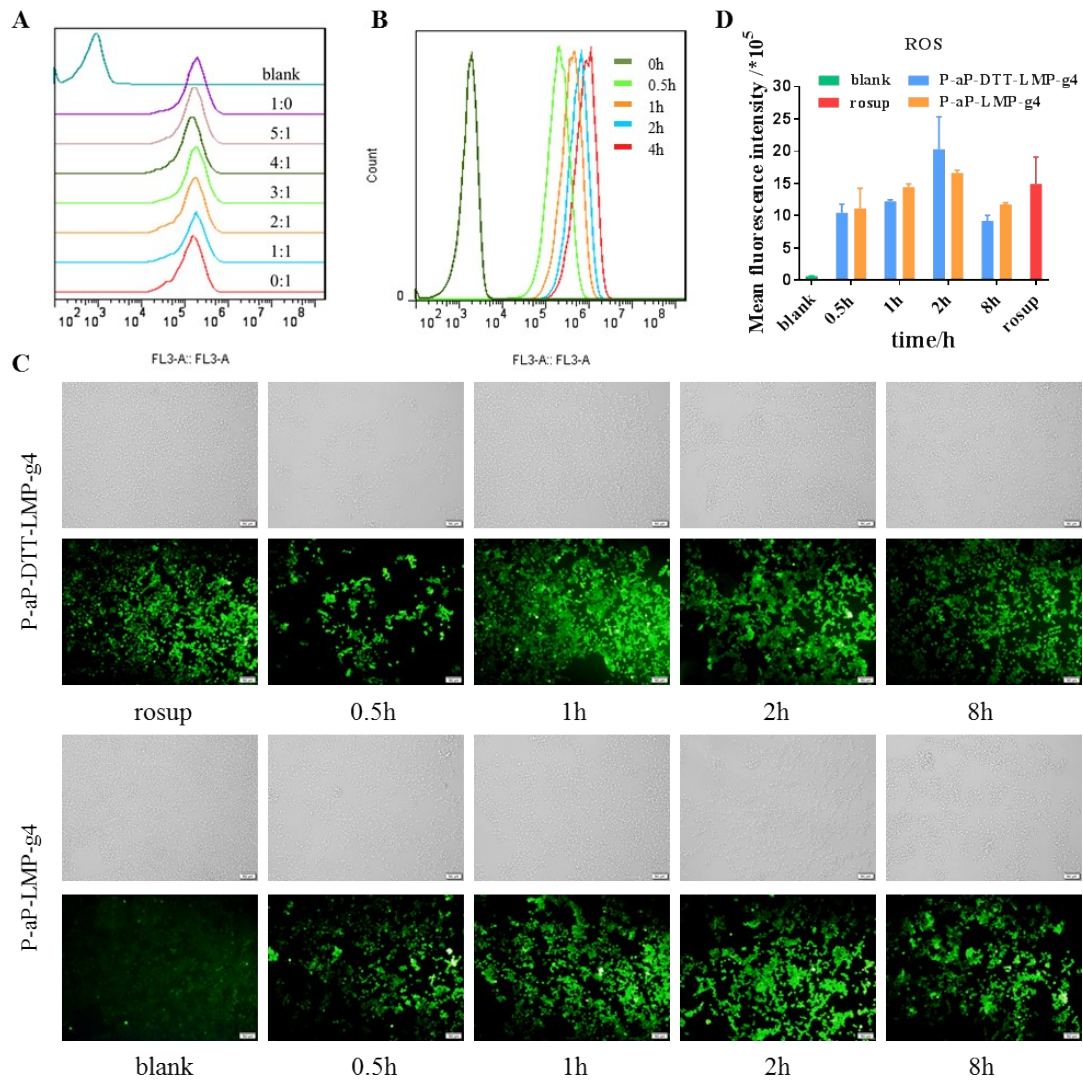

Fig. S4. Intracellular uptake of P-ap-DTT-plasmids polyplex NPs and ROS on 293T cells. (A) Uptake migration diagram at the different ratios between PBAE and aPBAE at 2h (plasmids: GFP) and (B) at different time points. (C) Typical fluorescence microscopy of intracellular ROS level of HEK 293T cells incubated with P-aP-DTT/P-aP-LMP-g4 polyplex NPs and was detected by DCFH-DA probe at different time points (Scale bar, 100  $\mu\text{m}$ ) and (D) corresponding mean fluorescence intensity statistics ( $n = 2$ ).



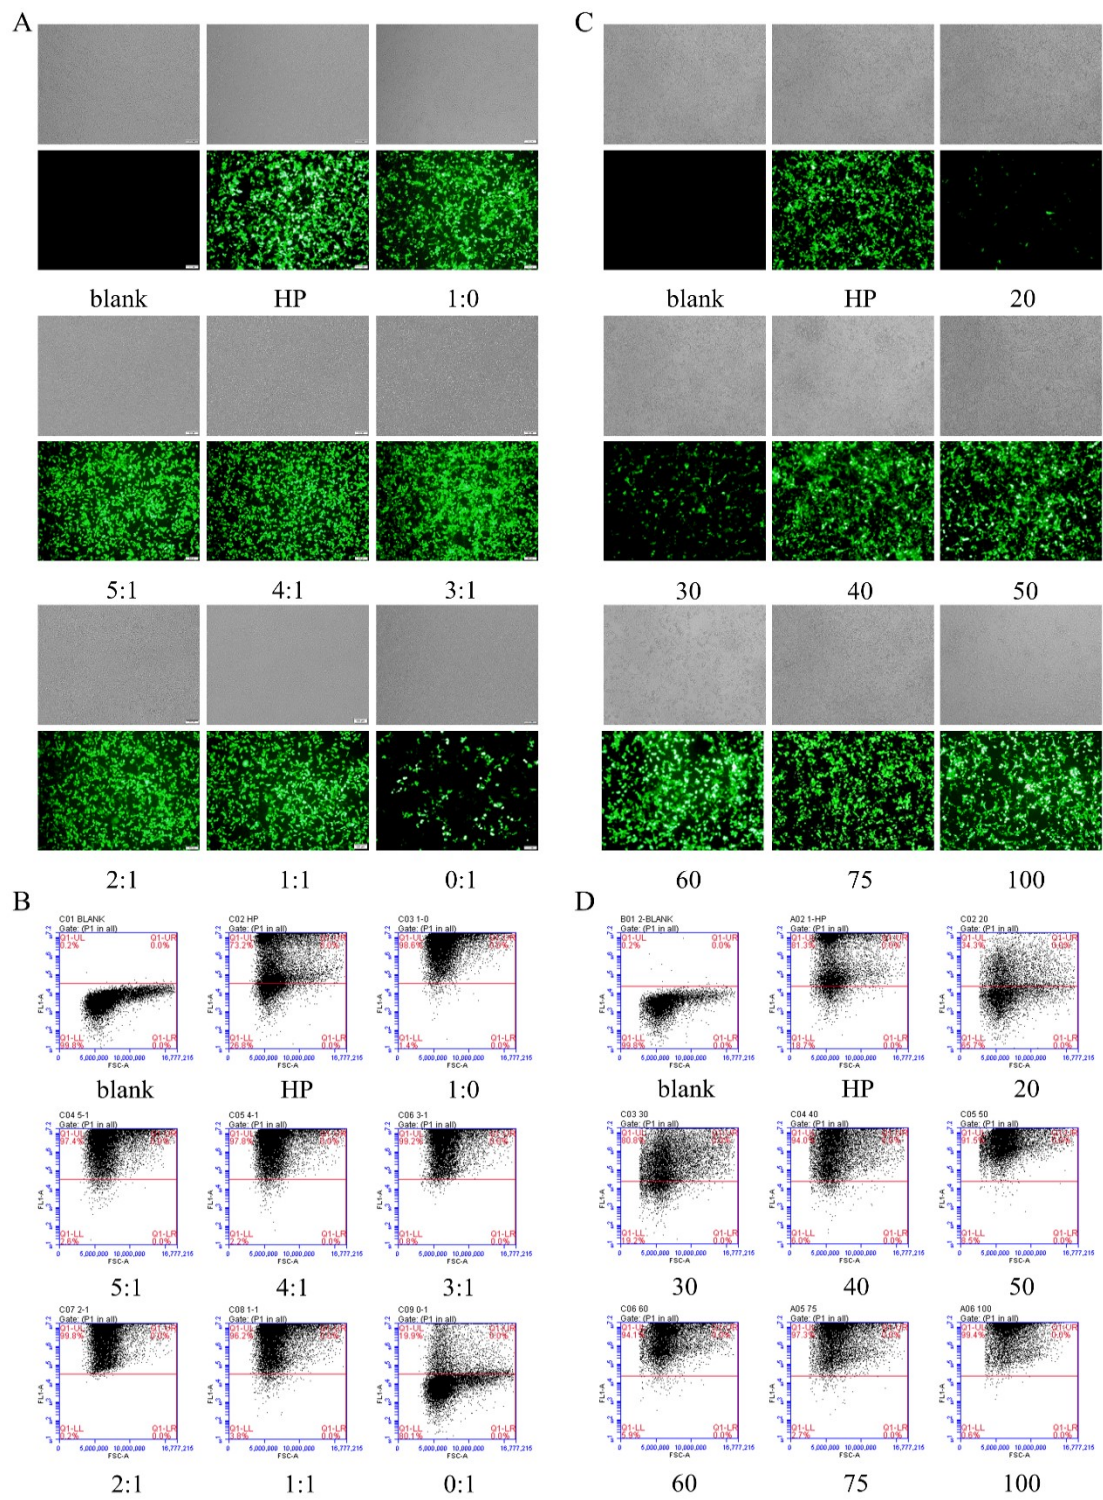

Fig. S5. Transfection efficiency (representative fluorescence microscopy images and flow cytometry results) of P-aP-DTT-GFP polyplex NPs in HEK 293T cells. (A) Typical fluorescence microscopy of transfection of HEK 293T cells at the different ratios between PBAE and aPBAE and (B) flow cytometry results. (C) Typical fluorescence microscopy of transfection of HEK 293T cells at the different mass ratios between polymer and GFP and (D) flow cytometry results (Scale bar, 100  $\mu$ m).

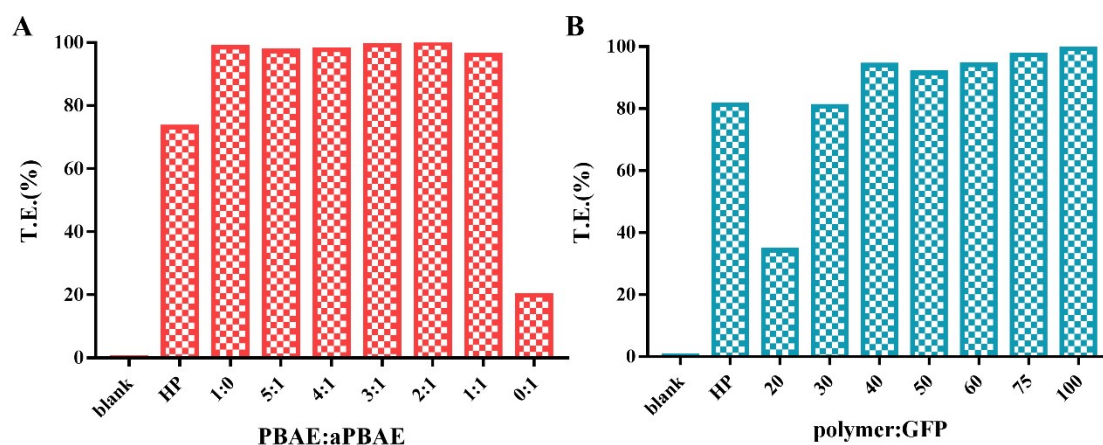

Fig. S6. Transfection efficiency (T.E.) of P-aP-DTT-GFP polyplex NPs in HEK 293T cells. (A) The quantitative results at the different ratios between PBAE and aPBAE and (B) at the different mass ratios between polymer and GFP.

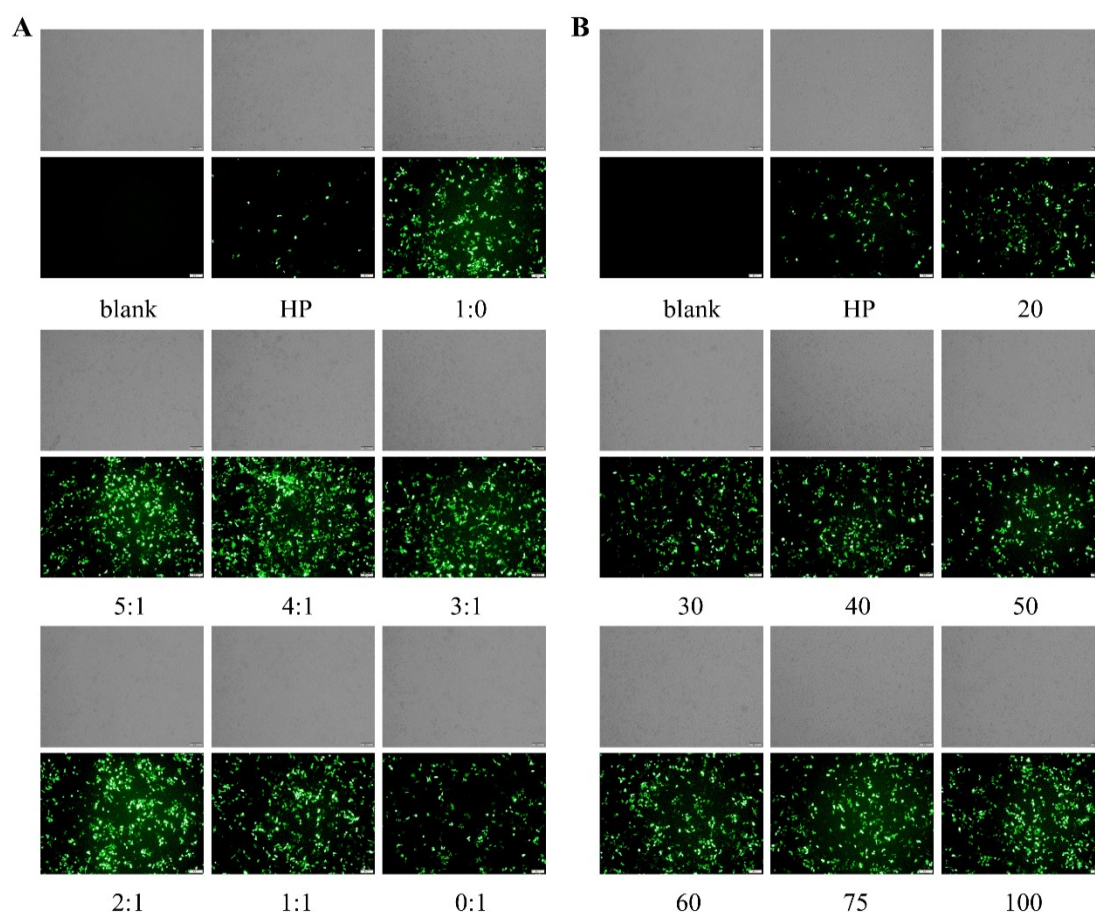

Fig. S7. Transfection efficiency (representative fluorescence microscopy images) of P-aP-DTT-GFP polyplex NPs in C666-1 cells (A) at the different ratios between PBAE and aPBAE and (B) at the different mass ratios between polymer and GFP (Scale bar, 100  $\mu$ m).

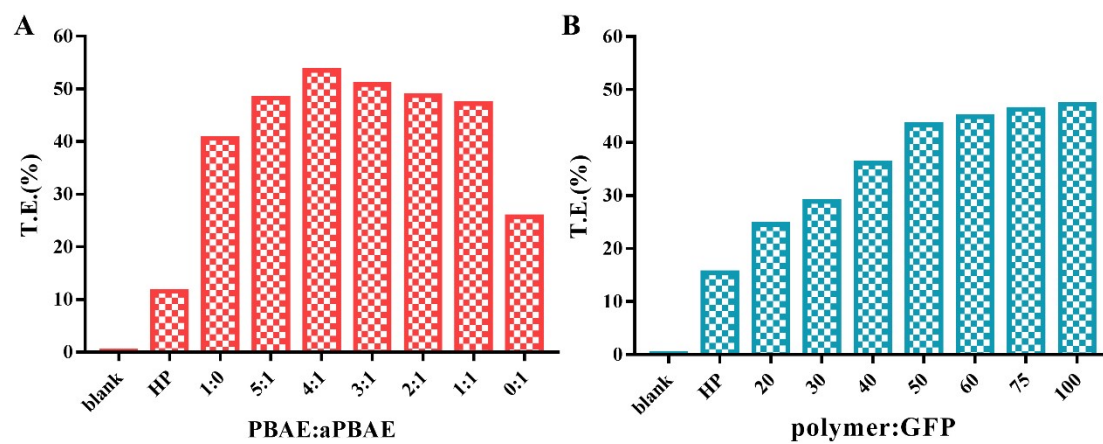

Fig. S8. Transfection efficiency (T.E.) of P-aP-DTT-GFP polyplex NPs in C666-1 cells. (A) The quantitative results at the different ratios between PBAE and aPBAE and (B) at the different mass ratios between polymer and GFP.



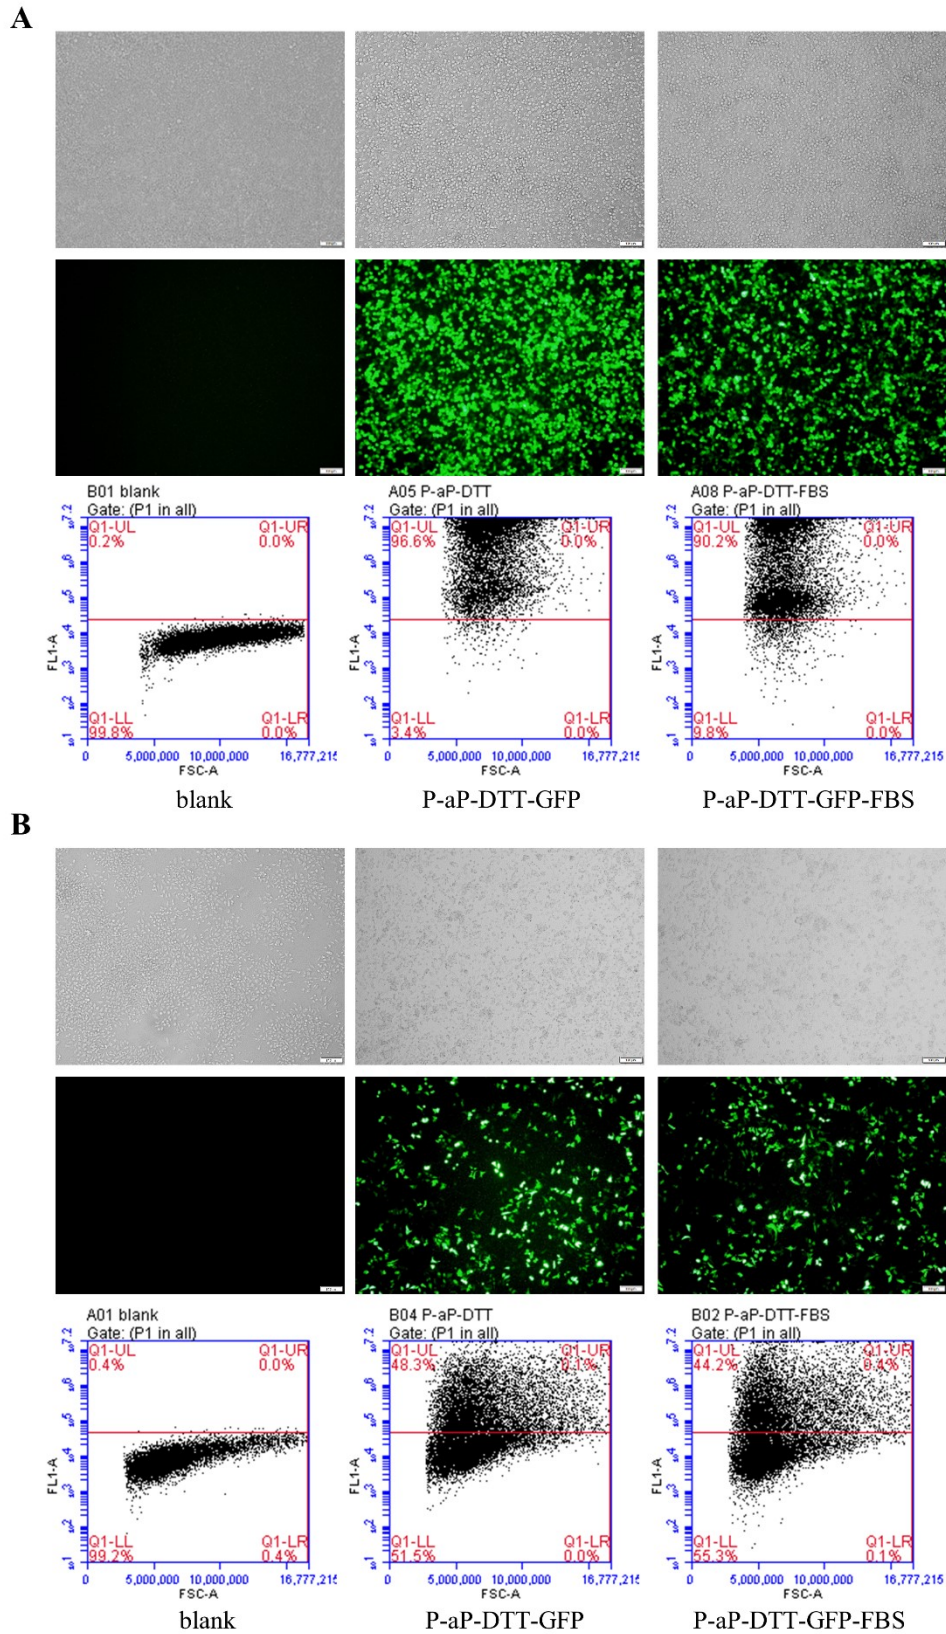

Fig. S9. Transfection efficiency (representative fluorescence microscopy images and flow cytometry results) of P-aP-DTT-GFP polyplex NPs with and without FBS in (A) HEK 293T cells or (B) C666-1 cells (Scale bar, 100  $\mu$ m).



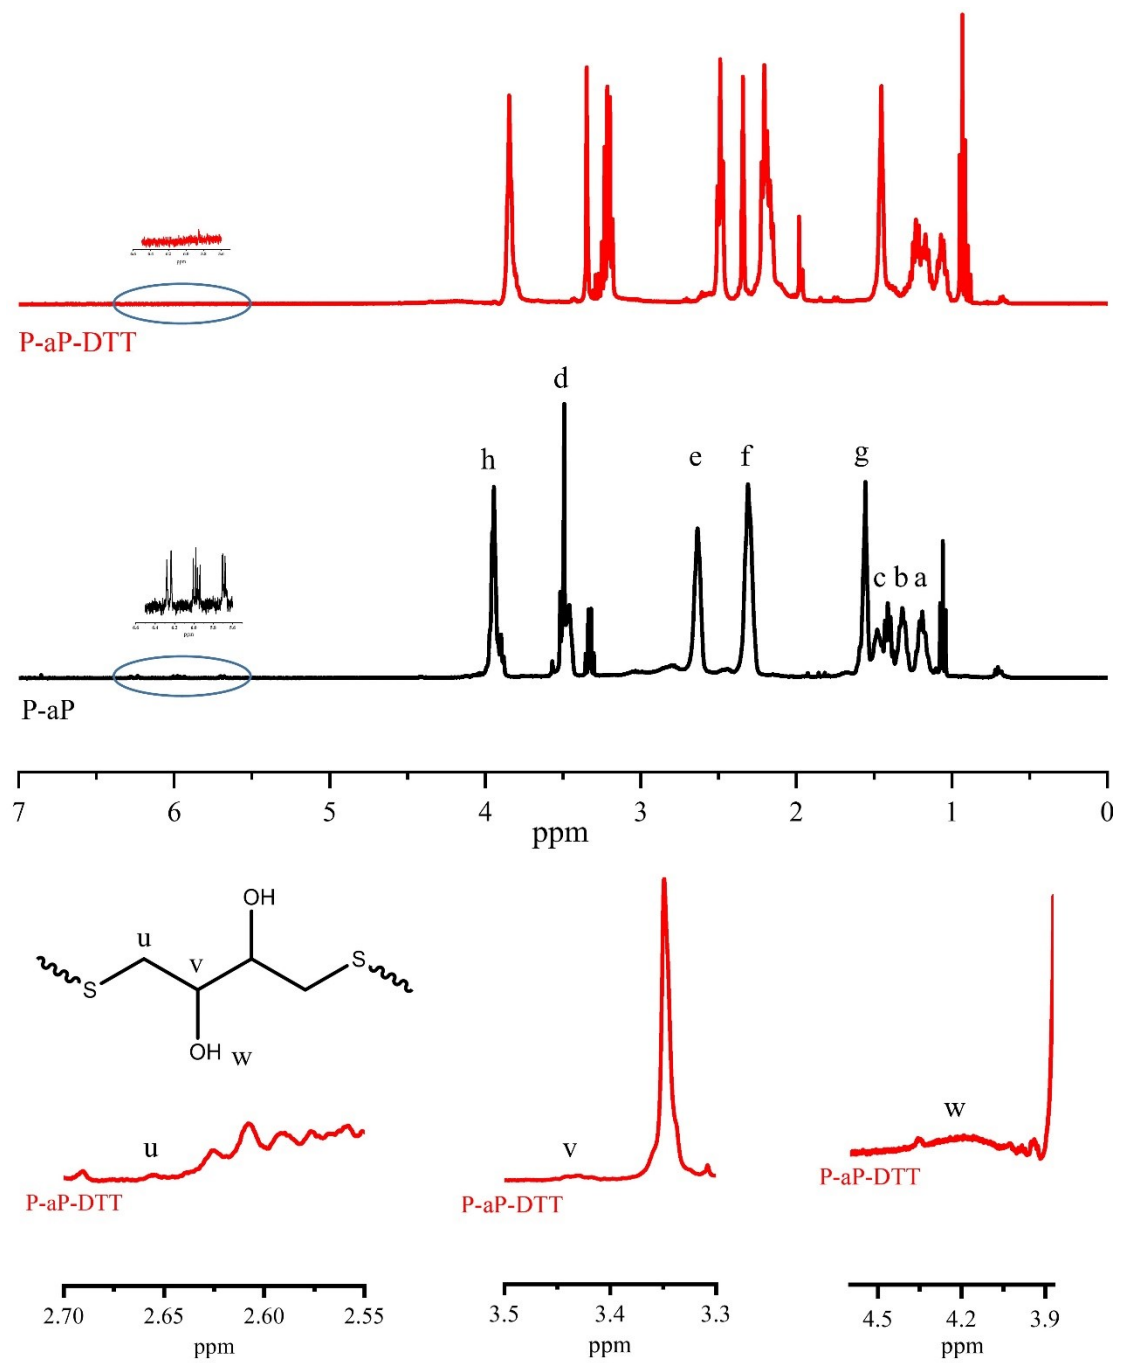

Fig. S10.  $^1\text{H}$ -NMR spectra of P-aP-DTT and P-aP.

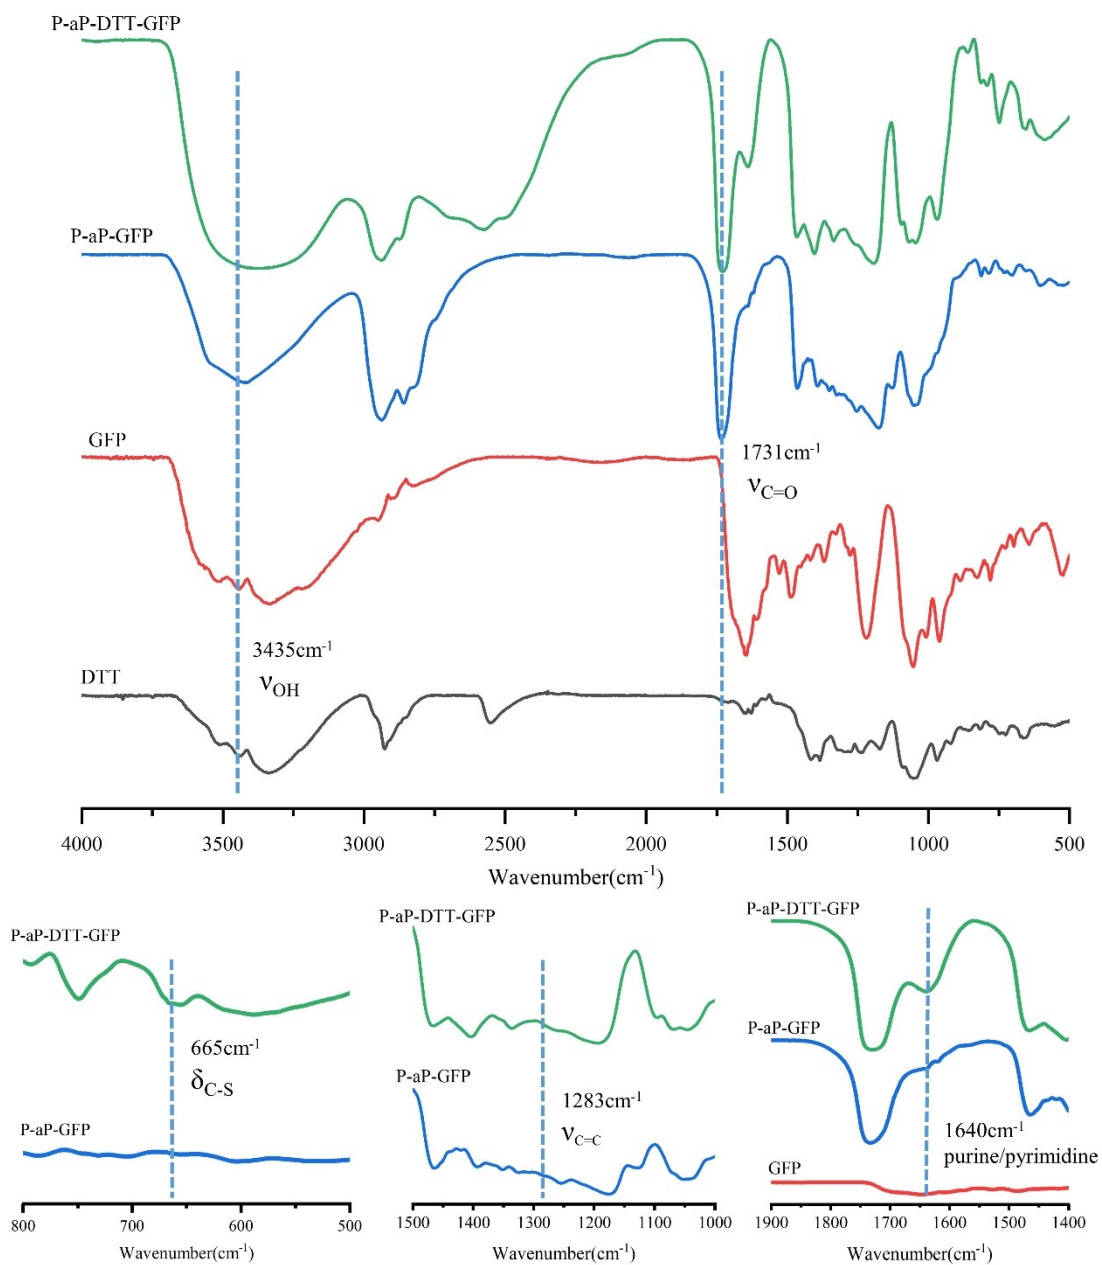

Fig. S11. FT-IR spectra of of P-aP-DTT-GFP polyplex NPs, P-aP-GFP polyplex NPs, GFP and DTT.

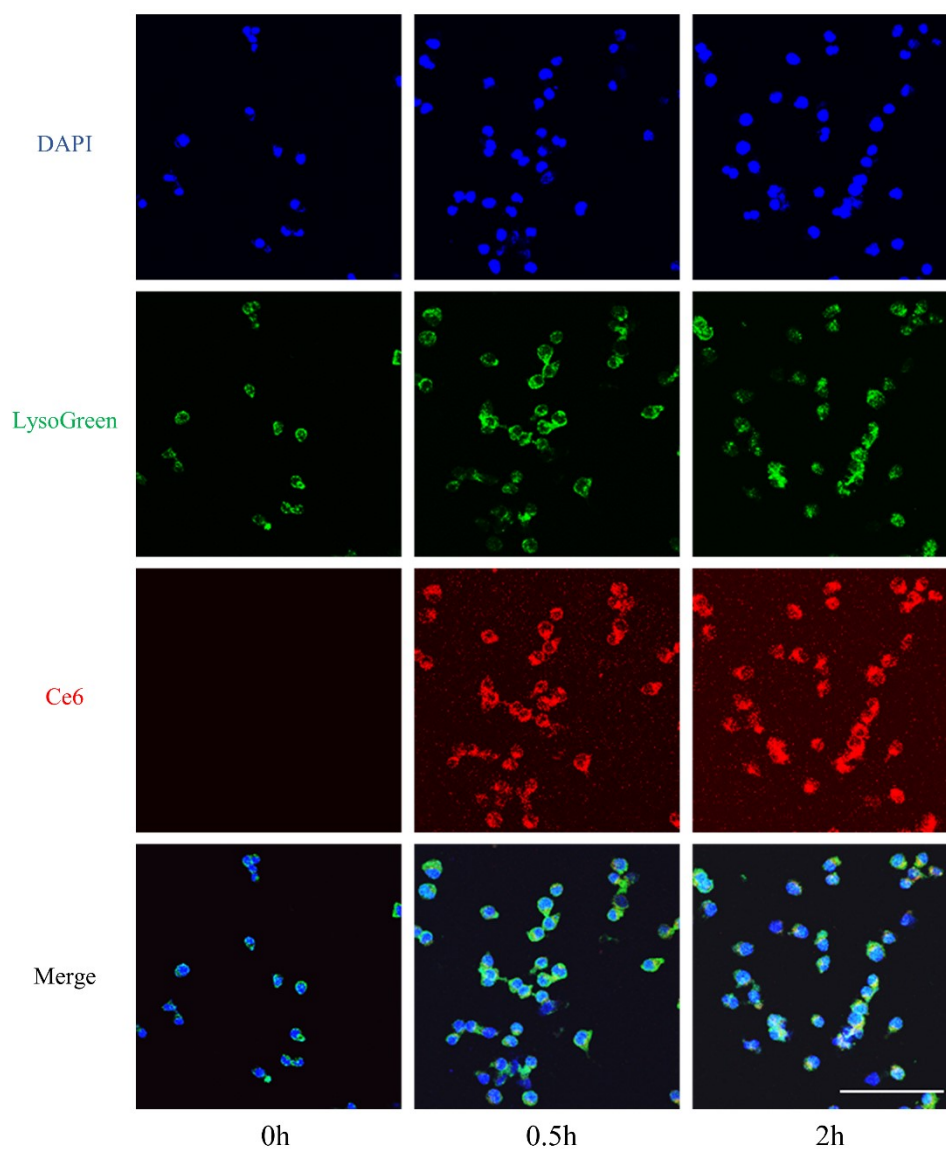

Fig. S12. Typical fluorescence microscopy images of intracellular uptake of C666-1 cells at different time points, blue: nucleus, green: lysosome, red: Ce6-P-aP-DTT-LMP-g4. (Scale bar, 100  $\mu\text{m}$ )



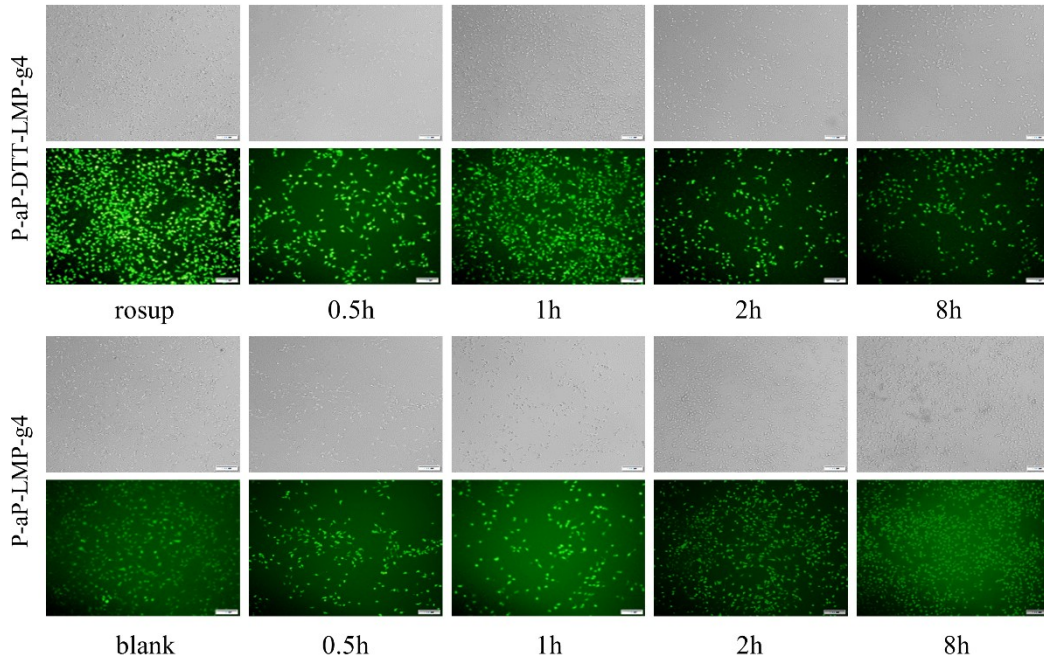

Fig. S13. Typical fluorescence microscopy of intracellular ROS level of C666-1 cells incubated with P-aP-DTT/P-aP-LMP-g4 polyplex NPs and was detected by DCFH-DA probe at different time points (Scale bar, 100  $\mu$ m).

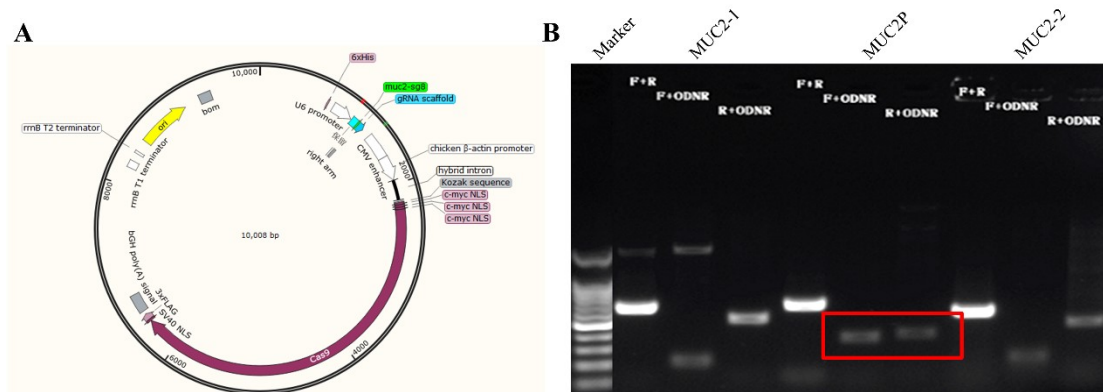

Fig. S14. Construction of *Muc2* targeting CRISPR/Cas9 plasmid (A) The schematic of plasmid. (B) Selection of *Muc2* targeting sgRNA before *in vivo* experiments.

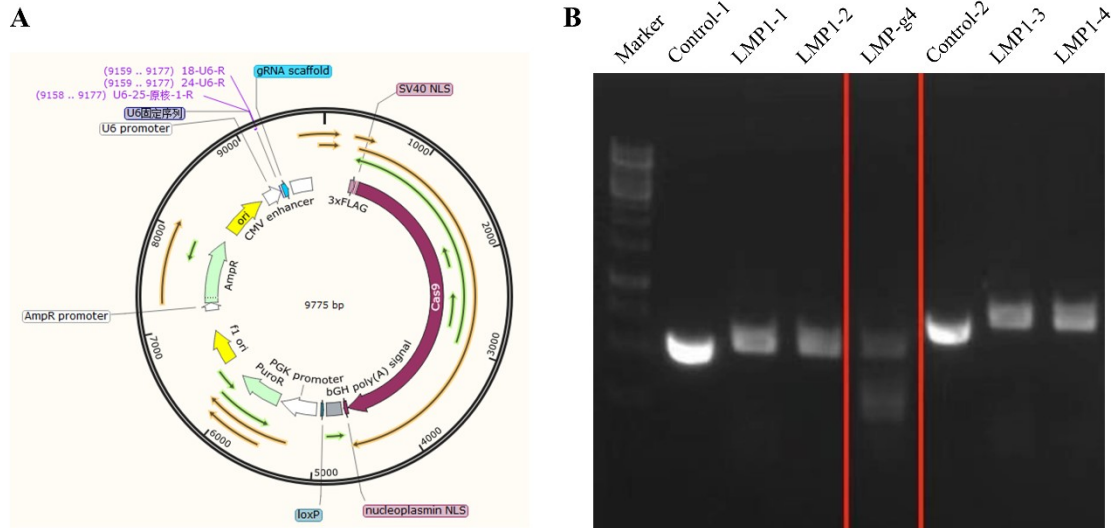

Fig. S15. Construction of *Lmp1* targeting CRISPR/Cas9 plasmid (A) The schematic of plasmid. (B) Selection of *Lmp1* targeting sgRNA before in vivo experiments.

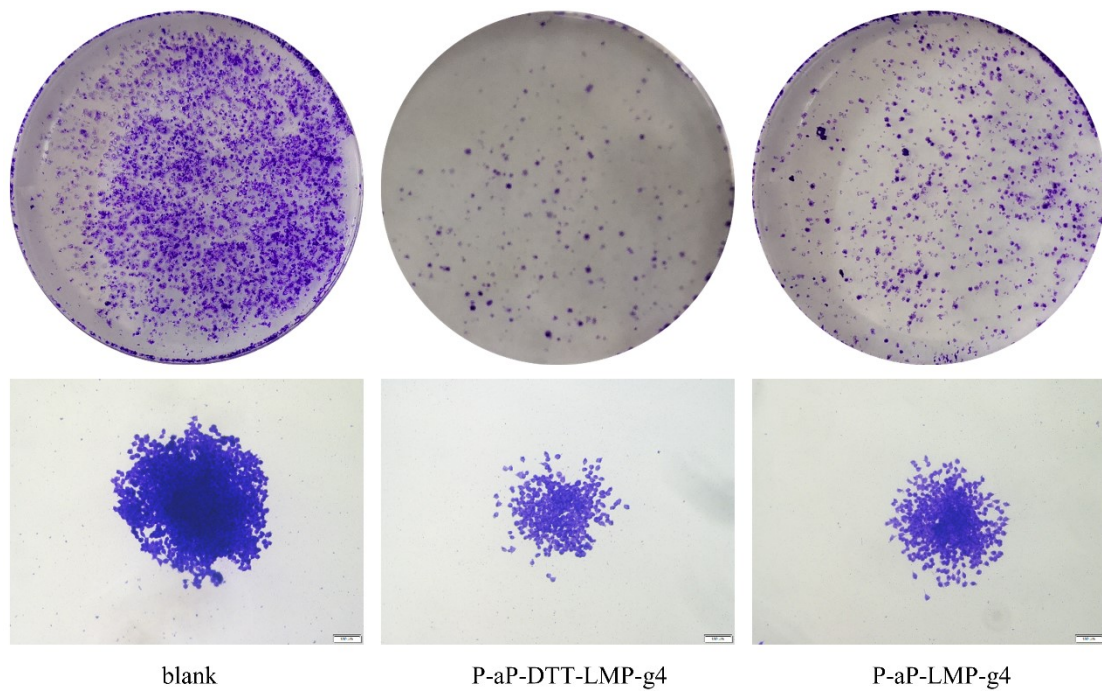

Fig. S16. C666-1 cells proliferation reflected by cell colony formation assay (Scale bar, 100  $\mu$ m).

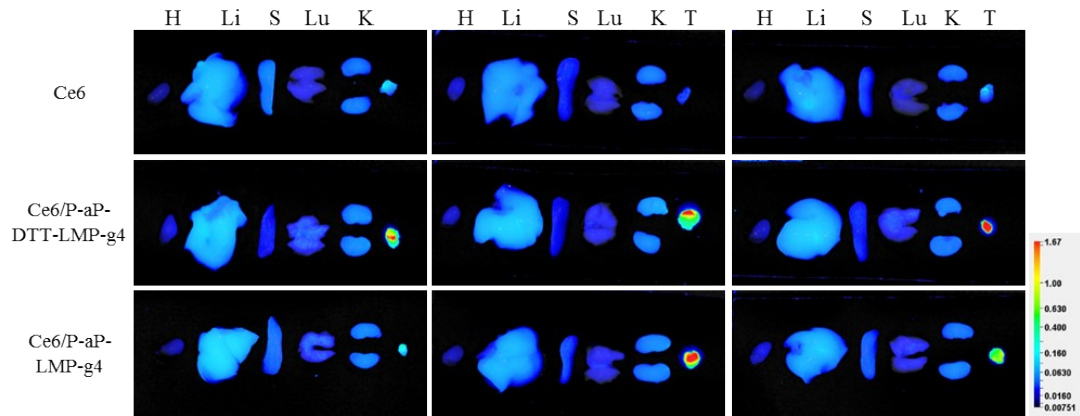

Fig. S17. Fluorescent images of hearts (H), livers (Li), spleens (S), lungs (Lu), kidneys (K) and tumors(T) in each group after administration for 24 h (n = 3).

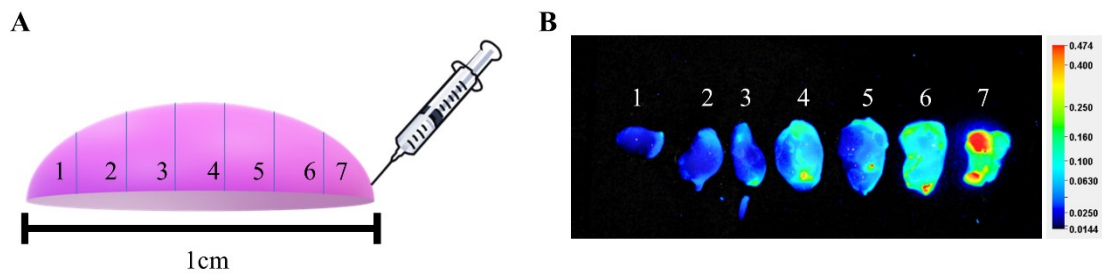

Fig. S18. Penetration of P-aP-DTT-GFP polyplex NPs after peritumoral administration for 24 h. (A) Schematic diagram of the direction of administration and tumor lateral resection. (B) Fluorescence images of tumor slices.



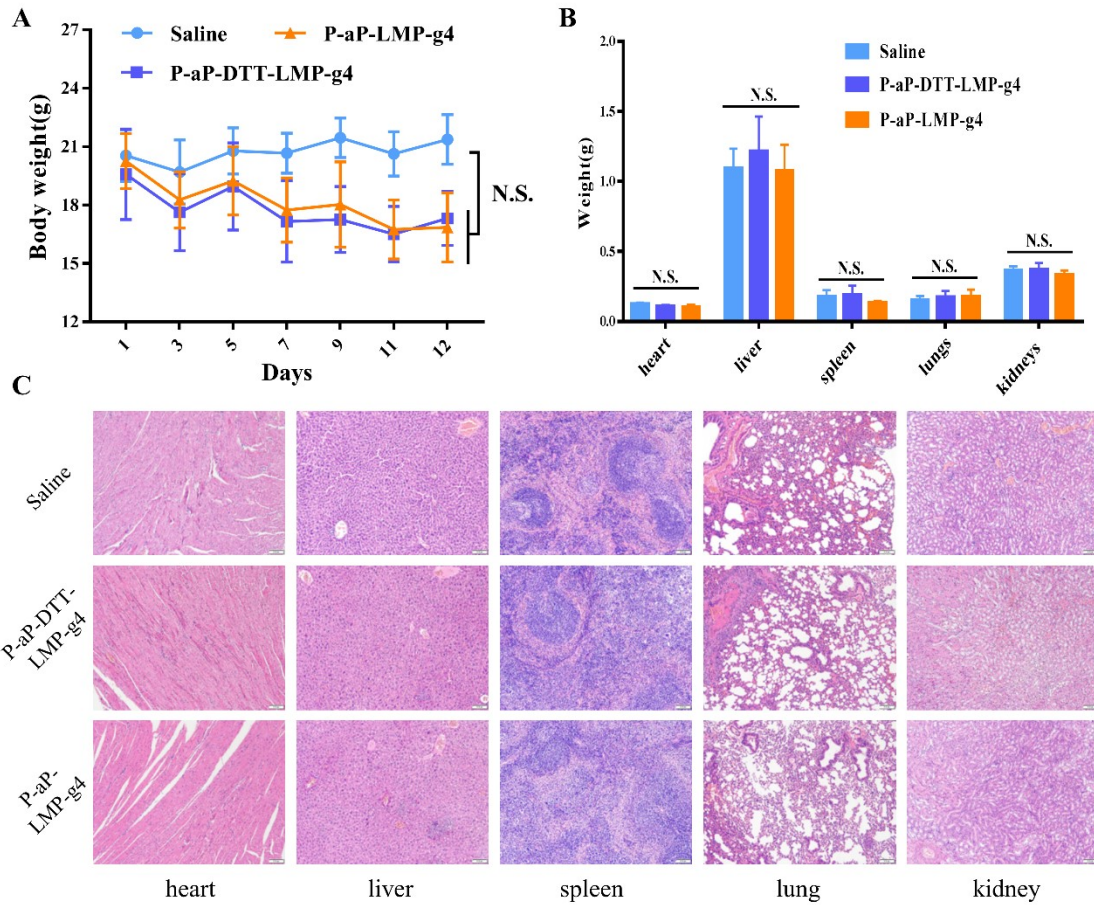

Fig. S19. *In vivo* C666-1 xenograft tumor growth treated by P-aP-DTT/P-aP-LMP-g4 polyplex NPs. (A) Body weight. (B) The weight of main organs (heart, liver, spleen, lungs and kidneys). (C) Representative images of H&E staining of major organs (heart, liver, spleen, lungs and kidneys) of mice that were treated with P-aP-DTT/P-aP-LMP-g4 polyplex NPs and Saline (Scale bar, 100 μm). One-way ANOVA was for statistical analysis, N.S.: no significant difference.

**Table S1. sgRNA sequence and corresponding PAM sequences**

| Name                 | Forward                   | Reverse                   |
|----------------------|---------------------------|---------------------------|
| <b><i>MUC2P</i></b>  | CAGCACGTCATCCTGAAGGT      | AAGACACCCTGGAGACACCT      |
| <b><i>LMP-g4</i></b> | ACTCTGCTCTCAAACCTAGGC     | CATGTCCTCCTTCCCCTTGT      |
| <b><i>OND</i></b>    | TTGAGTTGTCATATGTTAATAACGG | ACCGTTATTAACATATGACAACTCA |
|                      | T                         | A                         |

| Name          | sgRNA sequence (5'-3') | PAM sequence (5'-3') | Target gene |
|---------------|------------------------|----------------------|-------------|
| <i>LMP1-1</i> | CAGCCCTTCACACACCACAC   | AGG                  | LMP1        |
| <i>LMP1-2</i> | AGTCAGGCAAGCCTATGACA   | TGG                  | LMP1        |
| <i>LMP1-3</i> | TGGTGTTTCATCAGTGTGTCG  | TGG                  | LMP1        |
| <i>LMP1-4</i> | GATGAGTAGGAGGGTGACT    | GGG                  | LMP1        |
|               | G                      |                      |             |
| <i>LMP-g4</i> | GACCCGCCTTCGATGACAGA   | CGG                  | LMP1        |
| <i>MUC2-1</i> | ATGTCTGCATCGTGACCCTT   | GGG                  | MUC2        |
| <i>MUC2-2</i> | AGGTCACTGTTCGCAGCACTG  | GGG                  | MUC2        |
| <i>MUC2P</i>  | GGGGCACCTAGAGTGACCA    | AGG                  | MUC2        |
|               | G                      |                      |             |

**Table S2. Sequences of Sanger sequencing**

**The sequences of LMP-g4:**

GGTGCGGCGGCAGCCAATCAGAGCGGCGCGCTCCGAAAGTTTCCTTTTAT  
GGCGAGGCGGCGGCGGCGGCCCTATAAAAAGCGAAGCGCGGCGGCGG  
GCGGGAGTCGCTGCGCGCTGCCTTCGCCCGTGCCCCGCTCCGCCGCCGC  
CTCGCGCCGCCCGCCCCGCTCTGACTGACCGCGTTACTCCCACAGGTGA  
GCGGGCGGGACGGCCCTTCTCCTCCGGGCTGTAATTAGCTGAGCAAGAGG  
TAAGGGTTTAAGGGATGGTTGGTTGGTGGGGTATTAATGTTTAATTACCTG  
GAGCACCTGCCTGAAATCACTTTTTTTCAGGTTGGACCGGTGCCACCATGG  
ACTATAAGGACCACGACGGAGACTACAAGGATCATGATATTGATTACAAA  
GACGATGACGATAAGATGGCCCCAAAGAAGAAGCGGAAGGTTCGGTATCC

ACGGAGTCCCAGCAGCCGACAAGAAGTACAGCATCGGCCTGGACATCGG  
CACCAACTCTGTGGGCTGGGCCGTGATCACCGACGAGTACAAGGTGCCA  
GCAAGAAATTCAAGGTGCTGGGCAACACCGACCGGCACAGCATCAAGAA  
GAACCTGATCGGAGCCCTGCTGTTTCGACAGCGGCGAAACAGCCGAGGCCA  
CCCGGCTGAAGAGAACCGCCAGAAGAAGATACACCAGACGGAAGAACCG  
GATCTGCTATCTGCAAGAGATCTTCAGCAACGAGATGGCCAAGGTGGACG  
ACAGCTTCTTCCACAGACTGGAAGAGTCCTTCCTGGTGGAAAGAGGATAAG  
AAGCACGAGCGGCACCCCATCTTCGGCAACATCGTGGACGAGGTGGCCTA  
CCACGAGAAGTACCCACCATCTACCACCTGAGAAAGAACTGGTGGACA  
GCACCGACAAGGCCGACCTGCGGCTGATCTATCTGGCCCTGGCCCACATG  
ATCAAGTTCCGGGGCCACTTCCTGATCGAGGGCGACCTGAACCCCGACAA  
CAGCGACGTGGACAAGCTGTTTCATCCAGCTGGTGCAGACCTACAACCAGC  
TGTTTCGAGGAAAACCCCATCAACGCCAGCGGGCTGGACGCCAAGGCCATC  
CTGTCTGCCAGACTGAGCAAGAGCAGACGGCTGGAAAATCTGATCGCCA  
GCTGCCCCGGCGAGAAGAAGAATGGCCTGTTTCGGAAACCTGATTGCCCTGA  
GCCTGGGCCTGACCCCAACTTCAAGAGCAACTTCGACCTGGCCGAGGAT  
GCCAAACTGCAGCTGAGCAAGGACACCTACGACGACGACCTGGACAACC  
TGCTGGCCCAGATCGGGCACCAGTACGCCGACCTGTTTCTGGCCGCCAAG  
AACCTGTCCGACGCCATCCTGCTGAGCGACATCCTGAGAGTGAACACCGA  
GATCACCAAGGCCCCCTGAGCGCCTCTATGATCAAGAGATACGACGAGC  
ACCACCAGGACCTGACCCTGCTGAAAGCTCTCGTGCGGCAGCAGCTGCCT  
GAGAAGTACAAAGAGATTTTCTTCGACCAGAGCAAGAACGGCTACGCCG  
GCTACATTGACGGCGGAGCCAGCCAGGAAGAGTTCTACAAGTTCATCAAG  
CCCATCCTGGAAAAGATGGACGGCACCGAGGAACTGCTCGTGAAGCTGA  
ACAGAGAGGACCTGCTGCGGAAGCAGCGGACCTTCGACAACGGCAGCAT  
CCCCACCAGATCCACCTGGGAGAGCTGCACGCCATTCTGCGGGCGGCAGG  
AAGATTTTTTACCATTCTGAAGGACAACCGGGAAAAGATCGAGAAGATC  
CTGACCTTCCGCATCCCCTACTACGTGGGCCCTCTGGCCAGGGGAAACAG  
CAGATTCGCCTGGATGACCAGAAAGAGCGAGGAAACCATCACCCCTGG  
AACTTCGAGGAAGTGGTGGACAAGGGCGCTTCCGCCCAGAGCTTCATCGA  
GCGGATGACCAACTTCGATAAGAACCTGCCCAACGAGAAGGTGCTGCCCA  
AGCACAGCCTGCTGTACGAGTACTTCACCGTGTATAACGAGCTGACCAA  
GTGAAATACGTGACCGAGGGAATGAGAAAGCCCGCCTTCCTGAGCGGCG  
AGCAGAAAAAGGCCATCGTGGACCTGCTGTTCAAGACCAACCGGAAAGT  
GACCGTGAAGCAGCTGAAAGAGGACTACTTCAAGAAAATCGAGTGCTTCG  
ACTCCGTGGAAATCTCCGGCGTGGAAGATCGGTTCAACGCCTCCCTGGGC  
ACATAACGATCTGCTGAAAATTATCAAGGACAAGGACTTCCTGGACAA  
TGAGGAAAACGAGGACATTCTGGAAGATATCGTGCTGACCCTGACTGT  
TTGAGGACAGAGAGATGATCGAGGAACGGCTGAAAACCTATGCCACCT  
GTTTCGACGACAAAGTGATGAAGCAGCTGAAGCGGCGGAGATACACGGC  
TGGGGCAGGCTGAGCCGGAAGCTGATCAACGGCATCCGGGACAAGCAGT  
CCGGCAAGACAATCCTGGATTTCTGAAGTCCGACGGCTTCGCCAACAGA  
AACTTCATGCAGCTGATCCACGACGACAGCCTGACCTTTAAAGAGGACAT  
CCAGAAAGCCCAGGTGTCCGGCCAGGGCGATAGCCTGCACGAGCACATTG



CCAATCTGGCCGGCAGCCCCGCCATTAAGAAGGGCATCCTGCAGACAGTG  
AAGGTGGTGGACGAGCTCGTGAAAGTGATGGGCCGGCACAAGCCCGAGA  
ACATCGTGATCGAAATGGCCAGAGAGAACCAGACCACCCAGAAGGGACA  
GAAGAACAGCCGCGAGAGAATGAAGCGGATCGAAGAGGGCATCAAAGA  
GCTGGGCAGCCAGATCCTGAAAGAACACCCCGTGGAAAACACCCAGCTG  
CAGAACGAGAAGCTGTACCTGTACTACCTGCAGAATGGGCGGGATATGTA  
CGTGGACCAGGAAGTGGACATCAACCGGCTGTCCGACTACGATGTGGACC  
ATATCGTGCCTCAGAGCTTTCTGAAGGACGACTCCATCGACAACAAGGTG  
CTGACCAGAAGCGACAAGAACCGGGGCAAGAGCGACAACGTGCCCTCCG  
AAGAGGTCTGTAAGAAGATGAAGAAGTACTGGCGGCAGCTGCTGAACGC  
CAAGCTGATTACCCAGAGAAAGTTCGACAATCTGACCAAGGCCGAGAGA  
GGCGGCCTGAGCGAACTGGATAAGGCCGGCTTCATCAAGAGACAGCTGGT  
GGAAACCCGGCAGATCACAAAGCACGTGGCACAGATCCTGGACTCCCGG  
ATGAACACTAAGTACGACGAGAATGACAAGCTGATCCGGGAAGTGAAAG  
TGATCACCTGAAGTCCAAGCTGGTGTCCGATTTCCGGAAGGATTTCCAGT  
TTTACAAAGTGC GCGAGATCAACAACCTACCACCACGCCACGACGCCTAC  
CTGAACGCCGTCGTGGGAACCGCCCTGATCAAAAAGTACCCTAAGCTGGA  
AAGCGAGTTCGTGTACGGCGACTACAAGGTGTACGACGTGCGGAAGATG  
ATCGCCAAGAGCGAGCAGGAAATCGGCAAGGCTACCGCCAAGTACTTCTT  
CTACAGCAACATCATGAACTTTTTCAAGACCGAGATTACCCTGGCCAACG  
GCGAGATCCGGAAGCGGCCTCTGATCGAGACAAACGGCGAAACCGGGGA  
GATCGTGTGGGATAAGGGCCGGGATTTTGCCACCGTGCGGAAGTGCTGA  
GCATGCCCAAGTGAATATCGTGAAAAGACCGAGGTGCAGACAGGCCG  
CTTCAGCAAAGAGTCTATCCTGCCCAAGAGGAACAGCGATAAGCTGATCG  
CCAGAAAGAAGGACTGGGACCCTAAGAAGTACGGCGGCTTCGACAGCCC  
CACCGTGGCCTATTCTGTGCTGGTGGTGGCCAAAGTGGAAGGGCAAGT  
CCAAGAACTGAAGAGTGTGAAAGAGCTGCTGGGGATCACCATCATGGA  
AAGAAGCAGCTTCGAGAAGAATCCCATCGACTTTCTGGAAGCCAAGGGCT  
ACAAAGAAGTGAAAAAGGACCTGATCATCAAGCTGCCTAAGTACTCCCTG  
TTCGAGCTGGAAAACGGCCGGAAGAGAATGCTGGCCTCTGCCGGCGAACT  
GCAGAAGGGAAACGAACTGGCCCTGCCCTCCAAATATGTGAACTTCTGT  
ACCTGGCCAGCCACTATGAGAAGCTGAAGGGCTCCCCGAGGATAATGAG  
CAGAAACAGCTGTTTGTGGAACAGCACAAAGCACTACCTGGACGAGATCAT  
CGAGCAGATCAGCGAGTTCTCCAAGAGAGTGATCCTGGCCGACGCTAATC  
TGGACAAAGTGCTGTCCGCCTACAACAAGCACCCGGGATAAGCCCATCAGA  
GAGCAGGCCGAGAATATCATCCACCTGTTTACCCTGACCAATCTGGGAGC  
CCCTGCCGCCTTCAAGTACTTTGACACCACCATCGACCGGAAGAGGTACA  
CCAGCACCAAAGAGGTGCTGGACGCCACCCTGATCCACCAGAGCATCACC  
GGCCTGTACGAGACACGGATCGACCTGTCTCAGCTGGGAGGCGACAAAA  
GGCCGGCGGCCACGAAAAGGCCGGCCAGGCAAAAAGAAAAGTAAG  
AATTCCTAGAGCTCGCTGATCAGCCTCGACTGTGCCTTCTAGTTGCCAGCC  
ATCTGTTGTTTGGCCCTCCCCCGTGCCTTCTTGACCCTGGAAGGTGCCAC  
TCCACTGTCTTTTCTAATAAAAATGAGGAAATTGCATCGCATTGTCTGAG  
TAGGTGTCAATTCTATTCTGGGGGGTGGGGTGGGGCAGGACAGCAAGGGGG

AGGATTGGGAAGAGAATAGCAGGCATGCTGGGGAGCGTACAAGTAAGAA  
TTCCGATCATATTCAATAACCCTTAATATAACTTCGTATAATGTATGCTAT  
ACGAAGTTATTAGGTCTGAAGAGGAGTTTACGTCCAGCCAAGCTTAGGAT  
CTCGACCTCGAAATTCTACCGGGTAGGGGAGGCGCTTTTCCCAAGGCAGT  
CTGGAGCATGCGCTTTAGCAGCCCCGCTGGGCACTTGGCGCTACACAAGT  
GGCTCTGGCCTCGCACACATTCCACATCCACCGGTAGGGCGCCAACCGGC  
TCCGTTCTTTGGTGGCCCCTTCGCGCCACCTTCTACTCCTCCCCTAGTCAGG  
AAGTTCCCCCGCCCCGAGCTCGCGTCGTGCAGGACGTGACAAATGGA  
AGTAGCACGTCTCACTAGTCTCGTGCAGATGGACAGCACCGCTGAGCAAT  
GGAAGCGGGTAGGCCTTTGGGGCAGCGGCCAATAGCAGCTTTGCTCCTTC  
GCTTTCTGGGCTCAGAGGCTGGGAAGGGGTGGGTCCGGGGGCGGGCTCAG  
GGGCGGGCTCAGGGGCGGGGCGGGCGCCCGAAGGTCCTCCGGAGGCCCG  
GCATTCTGCACGCTTCAAAGCGCACGTCTGCCGCGCTGTTCTCCTCTTCC  
TCATCTCCGGGCCTTTTCGACCTGCATCCATCTAGATCTCGAGCAGCTGAAG  
CTTACCATGACCGAGTACAAGCCCACGGTGCGCCTCGCCACCCGCGACGA  
CGTCCCCAGGGCCGTACGCACCTCGCCGCCGCGTTCGCCGACTACCCCG  
CCACGCGCCACACCGTCGATCCGGACCGCCACATCGAGCGGGTCACCGAG  
CTGCAAGAACTCTTCCTCACGCGCGTCGGGCTCGACATCGGCAAGGTGTG  
GGTCGCGGACGACGGCGCCGCGGTGGCGGTCTGGACCACGCCGGAGAGC  
GTCGAAGCGGGGGCGGTGTTTCGCCGAGATCGGCCCGCGCATGGCCGAGTT  
GAGCGGTTCCCGGCTGGCCGCGCAGCAACAGATGGAAGGCCTCCTGGCGC  
CGCACCGGCCCAAGGAGCCCGCGTGGTTCTGGCCACCGTCGGCGTCTCG  
CCCGACCACCAGGGCAAGGGTCTGGGCAGCGCCGTCGTGCTCCCCGGAGT  
GGAGGCGGCCGAGCGCGCCGGGGTGCCCGCCTTCCTGGAGACCTCCGCGC  
CCCACAACCTCCCCTTCTACGAGCGGCTCGGCTTCACCGTCACCGCCGACG  
TCGAGGTGCCCGAAGGACCGCGCACCTGGTGCATGACCCGCAAGCCCGGT  
GCCTGACGCCCCGCCACGACCCGACGCGCCCGACCGAAAGGAGCGCAC  
GACCCCATGCATCGATGATATCAGATCCCCGGGATGCAGAAATTGATGAT  
CTATTAACAATAAAGATGTCCACTAAAATGGAAGTTTTTCTGTCATACT  
TTGTTAAGAAGGGTGAGAACAGAGTACCTACATTTTGAATGGAAGGATTG  
GAGCGGCGCCTGATGCGGTATTTTCTCCTTACGCATCTGTGCGGTATTTCA  
CACCGCATAACGTCAAAGCAACCATAGTACGCGCCCTGTAGCGGCGCATT  
AGCGCGGCGGGTGTGGTGGTTACGCGCAGCGTGACCGCTACACTTGCCAG  
CGCCTTAGCGCCCGCTCCTTTTCGCTTTCTTCCCTTCCTTTCTCGCCACGTT  
GCCGGCTTTCCCCGTCAAGCTCTAAATCGGGGGCTCCCTTTAGGGTTCCGA  
TTTAGTGCTTTACGGCACCTCGACCCCAAAAACTTGATTTGGGTGATGGT  
TCACGTAGTGGGCCATCGCCCTGATAGACGGTTTTTTCGCCCTTTGACGTTG  
GAGTCCACGTTCTTTAATAGTGGACTCTTGTTCCAAACTGGAACAACACTC  
AACTCTATCTCGGGCTATTCTTTTGATTTATAAGGGATTTTGCCGATTTCCG  
TCTATTGGTTAAAAAATGAGCTGATTTAACAAAAATTTAACGCGAATTTA  
ACAAAATATTAACGTTTACAATTTTATGGTGCCTCTCAGTACAATCTGCT  
CTGATGCCGCATAGTTAAGCCAGCCCCGACACCCGCCAACACCCGCTGAC  
GCGCCCTGACGGGCTTGCTGCTCCCGGCATCCGCTTACAGACAAGCTGT  
GACCGTCTCCGGGAGCTGCATGTGTCAGAGGTTTTACCGTCATACCGA

AACGCGCGAGACGAAAGGGCCTCGTGATACGCCTATTTTTATAGGTTAAT  
GTCATGATAATAATGGTTTCTTAGACGTCAGGTGGCACTTTTCGGGGAAAT  
GTGCGCGGAACCCCTATTTGTTTATTTTTCTAAATACATTCAAATATGTAT  
CCGCTCATGAGACAATAACCCTGATAAATGCTTCAATAATATTGAAAAAG  
GAAGAGTATGAGTATTCAACATTTCCGTGTCGCCCTTATTCCCTTTTTTGC  
GGCATTTTGCCTTCCTGTTTTTGTCCACCCAGAAACGCTGGTGAAAGTAAA  
AGATGCTGAAGATCAGTTGGGTGCACGAGTGGGTTACATCGAACTGGATC  
TCAACAGCGGTAAGATCCTTGAGAGTTTTCGCCCCGAAGAACGTTTTCCA  
ATGATGAGCACTTTTAAAGTTCTGCTATGTGGCGCGGTATTATCCCGTATT  
GACGCCGGGCAAGAGCAACTCGGTCCGCATACACTATTCTCAGAATGA  
CTTGGTTGAGTACTCACCAGTCACAGAAAAGCATCTTACGGATGGCATGA  
CAGTAAGAGAATTATGCAGTGCTGCCATAACCATGAGTGATAAACTGCG  
GCCAACTTACTTCTGACAACGATCGGAGGACCGAAGGAGCTAACCGCTTT  
TTTGCACAACATGGGGGATCATGTAACCTCGCCTTGATCGTTGGGAACCGG  
AGCTGAATGAAGCCATACCAAACGACGAGCGTGACACCACGATGCCTGTA  
GCAATGGCAACAACGTTGCGCAAACCTATTAACCTGGCGAACTACTTACTCT  
AGCTTCCCGGCAACAATTAATAGACTGGATGGAGGCGGATAAAGTTGCAG  
GACCACTTCTGCGCTCGGCCCTTCCGGCTGGCTGGTTTATTGCTGATAAAT  
CTGGAGCCGGTGAGCGTGGAAGCCGCGGTATCATTGCAGCACTGGGGCCA  
GATGGTAAGCCCTCCCGTATCGTAGTTATCTACACGACGGGGAGTCAGGC  
AACTATGGATGAACGAAATAGACAGATCGCTGAGATAGGTGCCTCACTGA  
TTAAGCATTGGTAACTGTCAGACCAAGTTTACTCATATATACTTTAGATTG  
ATTTAAAACCTTCATTTTTAATTTAAAAGGATCTAGGTGAAGATCCTTTTTG  
ATAATCTCATGACCAAATCCCTTAACGTGAGTTTTTCGTTCCACTGAGCGT  
CAGACCCCGTAGAAAAGATCAAAGGATCTTCTTGAGATCCTTTTTTTCTGC  
GCGTAATCTGCTGCTTGCAAACAAAAAACCCACCGCTACCAGCGGTGGTT  
TGTTTGCCGGATCAAGAGCTACCAACTCTTTTTCCGAAGGTAACCTGGCTTC  
AGCAGAGCGCAGATACCAAATACTGTTCTTCTAGTGTAGCCGTAGTTAGG  
CCACCACTTCAAGAACTCTGTAGCACCGCCTACATACCTCGCTCTGCTAAT  
CCTGTTACCAGTGGCTGCTGCCAGTGGCGATAAGTCGTGTCTTACCGGGTT  
GGACTCAAGACGATAGTTACCGGATAAAGGCGCAGCGGTCCGGGCTGAACG  
GGGGGTTTCGTGCACACAGCCCAGCTTGGAGCGAACGACCTACACCGAACT  
GAGATACCTACAGCGTGAGCTATGAGAAAGCGCCACGCTTCCCGAAGGG  
AGAAAGGCGGACAGGTATCCGGTAAGCGGCAGGGTCGGAACAGGAGAGC  
GCACGAGGGAGCTTCCAGGGGGAAACGCCTGGTATCTTTATAGTCCTGTC  
GGGTTTCGCCACCTCTGACTTGAGCGTCGATTTTTGTGATGCTCGTCAGGG  
GGGCGGAGCCTATGGAAAACGCCAGCAACGCGGCCTTTTTACGGTTCCT  
GGCCTTTTGTGGCCTTTTGTCCACATGTGAGGGCCTATTTCCCATGATTC  
CTTCATATTTGCATATACGATACAAGGCTGTTAGAGAGATAATTGGAATTA  
ATTTGACTGTAAACACAAAGATATTAGTACAAAATACGTGACGTAGAAAG  
TAATAATTTCTTGGGTAGTTTGCAGTTTTAAAATTATGTTTTAAAATGGAC  
TATCATATGCTTACCGTAACTTGAAAGTATTTTCGATTTCTTGGCTTTATATA  
TCTTGTGGAAAGGACGAAACACCGACCCGCCTTCGATGACAGAGTTTTAG  
AGCTAGAAATAGCAAGTTAAAATAAGGCTAGTCCGTTATCAACTGAAAA



AGTGGCACCGAGTCGGTGCTTTTTCTAGCGCGTGCGCCAATTCTGCAGAC  
AAATGGCTCTAGAGGTACCCGTTACATAACTTACGGTAAATGGCCCGCCT  
GGCTGACCGCCCAACGACCCCGCCCATTGACGTCAATAGTAACGCCAAT  
AGGGACTTTCATTGACGTCAATGGGTGGAGTATTTACGGTAAACTGCC  
ACTTGGCAGTACATCAAGTGTATCATATGCCAAGTACGCCCCCTATTGAC  
GTCAATGACGGTAAATGGCCCGCCTGGCATTGTGCCCAGTACATGACCTT  
ATGGGACTTTCCTACTTGGCAGTACATCTACGTATTAGTCATCGCTATTAC  
CATGGTCGAGGTGAGCCCCACGTTCTGCTTCACTCTCCCCATCTCCCCC  
CTCCCCACCCCAATTTTGTATTTATTTATTTTTTAATTATTTTGTGCAGCG  
ATGGGGGCGGGGGGGGGGGGGGGGGGGCGGGGCGAGGGGCGGGGCGGGGCG  
AGGCGGAG

**The sequences of MUC2P:**

TCTTCTCTCATCCGCCAAAACAGCCAAGCTGGAGACCGTTTGACATTACCC  
TGTTATCCCTAGATACATTACCCTGTTATCCCAGATGACATACCCTGTTAT  
CCCTAGATGACATTACCCTGTTATCCCAGATGACATTACCCTGTTATCCCT  
AGATACATTACCCTGTTATCCCAGATGACATACCCTGTTATCCCTAGATGA

CATTACCCTGTTATCCCAGATGACATTACCCTGTTATCCCTAGATACATTA  
CCCTGTTATCCCAGATGACATAACCCTGTTATCCCTAGATGACATTACCCTG  
TTATCCCAGATGACATTACCCTGTTATCCCTAGATACATTACCCTGTTATC  
CCAGATGACATAACCCTGTTATCCCTAGATGACATTACCCTGTTATCCCAGA  
TGACATTACCCTGTTATCCCTAGATACATTACCCTGTTATCCCAGATGACA  
TACCCTGTTATCCCTAGATGACATTACCCTGTTATCCCAGATGACATTACC  
CTGTTATCCCTAGATACATTACCCTGTTATCCCAGATGACATAACCCTGTTA  
TCCCTAGATGACATTACCCTGTTATCCCAGATGACATTACCCTGTTATCCC  
TAGATACATTACCCTGTTATCCCAGATGACATAACCCTGTTATCCCTAGATG  
ACATTACCCTGTTATCCCAGATGACATTACCCTGTTATCCCTAGATACATT  
ACCCTGTTATCCCAGATGACATAACCCTGTTATCCCTAGATGACATTACCCT  
GTTATCCCAGATAAACTCAATGATGATGATGATGATGGTTCGAGACTCAGC  
GGCCGCGGTGCCAGGGCGTGCCCTTGGGCTCCCCGGGCGCGGAATTCCGA  
GGGCTATTTCCCATGATTCTTCATATTTGCATATACGATACAAGGCTGT  
TAGAGAGATAATTGGAATTAATTTGACTGTAAACACAAAGATATTAGTAC  
AAAATACGTGACGTAGAAAGTAATAATTTCTTGGGTAGTTTGCAGTTTTAA  
AATTATGTTTTAAAATGGACTATCATATGCTTACCGTAACTTGAAAGTATT  
TCGATTTCTTGGCTTTATATATCTTGTGGAAAGGACGAAACACcGAACAAA  
GCATTGGTGGTTCAGTGGTAGAATTCTCGCCTGCCACGCGGGAGGCCCGG  
GTTTCGATTCCCGGCCAATGCAGgggcacctagagtgaccagGTTTTAGAGCTAGAAA  
TAGCAAGTTAAAATAAGGCTAGTCCGTTATCAACTTGAAAAAGTGGCACC  
GAGTCGGTGCTTTTTTTTTTTGTTTTAGAGCTAGAAATAGCAAGTTAAAATA  
AGGCTAGTCCGTTTTTAGCGCGTGCGCCAATTCTGCAGACAAATGGCTCTA  
GAGGTACCCGTTACATAACTTACGGTAAATGGCCCGCCTGGCTGACCGCC  
CAACGACCCCCGCCATTGACGTCAATAGTAACGCCAATAGGGACTTTCC  
ATTGACGTCAATGGGTGGAGTATTTACGGTAAACTGCCCACTTGGCAGTA  
CATCAAGTGTATCATATGCCAAGTACGCCCCCTATTGACGTCAATGACGG  
TAAATGGCCCGCCTGGCATTGTGCCAGTACATGACCTTATGGGACTTTCC  
TACTTGGCAGTACATCTACGTATTAGTCATCGCTATTACCATGGTCGAGGT  
GAGCCCCACGTTCTGCTTCACTCTCCCCATCTCCCCCCCCCTCCCCACCCCC

AATTTTGTATTTATTTATTTTTTAATTATTTTGTGCAGCGATGGGGGCGGGG  
GGGGGGGGGGGGCGCGGCCAGGCGGGGCGGGGCGGGGCGAGGGGCGG  
GGCGGGGCGAGGCGGAGAGGTGCGGCGGCAGCCAATCAGAGCGGCGCGC  
TCGAAAGTTTCCTTTTATGGCGAGGCGGCGGCGGCGGCGGCCCTATAAA  
AAGCGAAGCGCGCGGGCGGGAGTCGCTGCGACGCTGCCTTCGCCCCG  
TGCCCCGCTCCGCCGCCCTCGCGCCGCCCGCCCCGGCTCTGACTGACCG  
CGTTACTCCCACAGGTGAGCGGGCGGGACGGCCCTTCTCCTCCGGGCTGT  
AATTAGCTGAGCAAGAGGTAAGGGTTTAAGGGATGGTTGGTTGGTGGGGT  
ATTAATGTTTAATTACCTGGAGCACCTGCCTGAAATCACTTTTTTTCAGGT  
TGGACCGGTGCCACCGCCACCATGGCGCCAGCGGCAAAGCGCGTAAAATT  
GGACCCAGCAGCCAAACGAGTAAACTCGATCCGGCTGCTAAACGAGTTA  
AGCTGGACGACAAGAAGTACAGCATCGGCCTGGACATCGGCACCAACTCT  
GTGGGCTGGGCCGTGATCACCGACGAGTACAAGGTGCCAGCAAGAAATT  
CAAGGTGCTGGGCAACACCGACCGGCACAGCATCAAGAAGAACCTGATC  
GGAGCCCTGCTGTTTCGACAGCGGCGAAACAGCCGAGGCCACCCGGCTGA  
AGAGAACCGCCAGAAGAAGATACACCAGACGGAAGAACCGGATCTGCTA  
TCTGCAAGAGATCTTCAGCAACGAGATGGCCAAGGTGGACGACAGCTTCT  
TCCACAGACTGGAAGAGTCCTTCTGGTGGAAAGAGGATAAGAAGCACGA  
GCGGCACCCCATCTTCGGCAACATCGTGGACGAGGTGGCCTACCACGAGA  
AGTACCCACCATCTACCACCTGAGAAAGAACTGGTGGACAGCACCGAC  
AAGGCCGACCTGCGGCTGATCTATCTGGCCCTGGCCACATGATCAAGTT  
CCGGGGCCACTTCTGATCGAGGGCGACCTGAACCCCGACAACAGCGACG  
TGGACAAGCTGTTTCATCCAGCTGGTGCAGACCTACAACCAGCTGTTTCGAG  
GAAAACCCCATCAACGCCAGCGGCGTGGACGCCAAGGCCATCCTGTCTGC  
CAGACTGAGCAAGAGCAGACGGCTGGAAAATCTGATCGCCCAGCTGCCC  
GGCGAGAAGAAGAATGGCCTGTTTCGGAAACCTGATTGCCCTGAGCCTGGG  
CCTGACCCCAACTTCAAGAGCAACTTCGACCTGGCCGAGGATGCCAAAC  
TGCAGCTGAGCAAGGACACCTACGACGACGACCTGGACAACCTGCTGGCC  
CAGATCGGCGACCAGTACGCCGACCTGTTTCTGGCCGCCAAGAACCTGTC  
CGACGCCATCCTGCTGAGCGACATCCTGAGAGTGAACACCGAGATCACCA

AGGCCCCCTGAGCGCCTCTATGATCAAGAGATACGACGAGCACCACCAG  
GACCTGACCCTGCTGAAAGCTCTCGTGCGGCAGCAGCTGCCTGAGAAGTA  
CAAAGAGATTTTCTTCGACCAGAGCAAGAACGGCTACGCCGGCTACATTG  
ACGGCGGAGCCAGCCAGGAAGAGTTCTACAAGTTCATCAAGCCCATCCTG  
GAAAAGATGGACGGCACCGAGGAACTGCTCGTGAAGCTGAACAGAGAGG  
ACCTGCTGCGGAAGCAGCGGACCTTCGACAACGGCAGCATCCCCACCAG  
ATCCACCTGGGAGAGCTGCACGCCATTCTGCGGGCGGCAGGAAGATTTTTA  
CCCATTCTGAAGGACAACCGGGAAAAGATCGAGAAGATCCTGACCTTCC  
GCATCCCCTACTACGTGGGCCCTCTGGCCAGGGGAAAACAGCAGATTCGCC  
TGGATGACCAGAAAGAGCGAGGAAACCATCACCCCCTGGAACCTTCGAGG  
AAGTGGTGGACAAGGGCGCTTCCGCCAGAGCTTCATCGAGCGGATGACC  
AACTTCGATAAGAACCTGCCCAACGAGAAGGTGCTGCCCAAGCACAGCCT  
GCTGTACGAGTACTTCACCGTGTATAACGAGCTGACCAAAGTGAAATACG  
TGACCGAGGGAATGAGAAAGCCCGCCTTCCTGAGCGGCGAGCAGAAAAA  
GGCCATCGTGGACCTGCTGTTCAAGACCAACCGGAAAGTGACCGTGAAGC  
AGCTGAAAGAGGACTACTTCAAGAAAATCGAGTGCTTCGACTCCGTGGAA  
ATCTCCGGCGTGGAAGATCGGTTCAACGCCTCCCTGGGCACATACCACGA  
TCTGCTGAAAATTATCAAGGACAAGGACTTCCTGGACAATGAGGAAAACG  
AGGACATTCTGGAAGATATCGTGCTGACCCTGACACTGTTTGAGGACAGA  
GAGATGATCGAGGAACGGCTGAAAACCTATGCCACCTGTTCGACGACAA  
AGTGATGAAGCAGCTGAAGCGGCGGAGATACACCGGCTGGGGCAGGCTG  
AGCCGGAAGCTGATCAACGGCATCCGGGACAAGCAGTCCGGCAAGACAA  
TCCTGGATTCCTGAAGTCCGACGGCTTCGCCAACAGAACTTCATGCAG  
CTGATCCACGACGACAGCCTGACCTTTAAAGAGGACATCCAGAAAGCCCA  
GGTGTCCGGCCAGGGCGATAGCCTGCACGAGCACATTGCCAATCTGGCCG  
GCAGCCCCGCCATTAAGAAGGGCATCCTGCAGACAGTGAAGGTGGTGGAA  
CGAGCTCGTGAAAGTGATGGGCCGGCACAAGCCCGAGAACATCGTGATC  
GAAATGGCCAGAGAGAACCAGACCACCAGAAGGGACAGAAGAACAGCC  
GCGAGAGAATGAAGCGGATCGAAGAGGGCATCAAAGAGCTGGGCAGCCA  
GATCCTGAAAGAACACCCCGTGGAAAACACCCAGCTGCAGAACGAGAAG

CTGTACCTGTACTACCTGCAGAATGGGCGGGATATGTACGTGGACCAGGA  
ACTGGACATCAACCGGCTGTCCGACTACGATGTGGACCATATCGTGCCTC  
AGAGCTTTCTGAAGGACGACTCCATCGACAACAAGGTGCTGACCAGAAGC  
GACAAGAACCGGGGCAAGAGCGACAACGTGCCCTCCGAAGAGGTCTGTGA  
AGAAGATGAAGAACTACTGGCGGCAGCTGCTGAACGCCAAGCTGATTACC  
CAGAGAAAGTTCGACAATCTGACCAAGGCCGAGAGAGGCGGCCTGAGCG  
AACTGGATAAGGCCGGCTTCATCAAGAGACAGCTGGTGGAAACCCGGCA  
GATCACAAAGCACGTGGCACAGATCCTGGACTCCCGGATGAACACTAAGT  
ACGACGAGAATGACAAGCTGATCCGGGAAGTGAAAGTGATCACCTGAA  
GTCCAAGCTGGTGTCCGATTTCCGGAAGGATTTCCAGTTTTACAAAGTGCG  
CGAGATCAACAACCTACCACCACGCCACGACGCCTACCTGAACGCCGTCG  
TGGAACCGCCCTGATCAAAAAGTACCCTAAGCTGGAAAGCGAGTTCGTG  
TACGGCGACTACAAGGTGTACGACGTGCGGAAGATGATCGCCAAGAGCG  
AGCAGGAAATCGGCAAGGCTACCGCCAAGTACTTCTTCTACAGCAACATC  
ATGAACTTTTTCAAGACCGAGATTACCCTGGCCAACGGCGAGATCCGGAA  
GCGGCCTCTGATCGAGACAAACGGCGAAACCGGGGAGATCGTGTGGGAT  
AAGGGCCGGGATTTTGCCACCGTGCGGAAAGTGCTGAGCATGCCCAAGT  
GAATATCGTGAAAAAGACCGAGGTGCAGACAGGCGGCTTCAGCAAAGAG  
TCTATCCTGCCAAGAGGAACAGCGATAAGCTGATCGCCAGAAAGAAGG  
ACTGGGACCCTAAGAAGTACGGCGGCTTCGACAGCCCCACCGTGGCCTAT  
TCTGTGCTGGTGGTGGCCAAAGTGGAAGGGCAAGTCCAAGAACTGA  
AGAGTGTGAAAGAGCTGCTGGGGATCACCATCATGGAAAGAAGCAGCTT  
CGAGAAGAATCCCATCGACTTTCTGGAAGCCAAGGGCTACAAAGAAGTG  
AAAAGGACCTGATCATCAAGCTGCCTAAGTACTCCCTGTTCGAGCTGGA  
AAACGGCCGGAAGAGAATGCTGGCCTCTGCCGGCGAACTGCAGAAGGGA  
AACGAACTGGCCCTGCCCTCCAAATATGTGAACTTCCTGTACCTGGCCAG  
CCACTATGAGAAGCTGAAGGGCTCCCCGAGGATAATGAGCAGAAACAG  
CTGTTTGTGGAACAGCACAAAGCACTACCTGGACGAGATCATCGAGCAGAT  
CAGCGAGTTCTCCAAGAGAGTGATCCTGGCCGACGCTAATCTGGACAAAG  
TGCTGTCCGCCTACAACAAGCACCGGGATAAGCCCATCAGAGAGCAGGCC



GAGAATATCATCCACCTGTTTACCCTGACCAATCTGGGAGCCCCTGCCGCC  
TTCAAGTACTTTGACACCACCATCGACCGGAAGAGGTACACCAGCACCAA  
AGAGGTGCTGGACGCCACCCTGATCCACCAGAGCATCACCGGCCTGTACG  
AGACACGGATCGACCTGTCTCAGCTGGGAGGCGACCCAAGAAGAAGAG  
GAAAGTCTCGAGCGACTACAAAGACCATGACGGTGATTATAAAGATCATG  
ACATCGATTACAAGGATGACGATGACAAGGCTGCAGGATGAGAATTCCTA  
GAGCTCGCTGATCAGCCTCGACTGTGCCTTCTAGTTGCCAGCCATCTGTTG  
TTTGCCCCTCCCCCGTGCCTTCCCTTGACCCTGGAAGGTGCCACTCCCACTG  
TCCTTTCCTAATAAAAATGAGGAAATTGCATCGCATTGTCTGAGTAGGTGTC  
ATTCTATTCTGGGGGGTGGGGTGGGGCAGGACAGCAAGGGGGAGGATTG  
GGAAGAGAATAGCAGGCATGCTGGGGACATGGGGGCCCCGCCCAACTGG  
GGTAACCTTTGAGTTCTCTCAGTTGGGGGTAATCAGCATCATGATGTGGTA  
CCACATCATGATGCTGATTATAAGAATGCGGCCGCCACACTCTAGTGGAT  
CTCGAGTTAATAATTCAGAAGAACTCGTCAAGAAGGCGATAGAAGGCGAT  
GCGCTGCGAATCGGGAGCGGCGATACCGTAAAGCACGAGGAAGCGGTCA  
GCCATTCGCCGCCAAGCTCTTCAGCAATATCACGGGTAGCCAACGCTAT  
GTCCTGATAGCGGTCCGCCACACCCAGCCGGCCACAGTCGATGAATCCAG  
AAAAGCGGCCATTTTCCACCATGATATTCGGCAAGCAGGCATCGCCATGG  
GTCACGACGAGATCCTCGCCGTCGGGCATGCTCGCCTTGAGCCTGGCGAA  
CAGTTCGGCTGGCGCGAGCCCCTGATGCTCTTCGTCCAGATCATCCTGATC  
GACAAGACCGGCTTCCATCCGAGTACGTGCTCGCTCGATGCGATGTTTCG  
CTTGGTGGTTCGAATGGGCAGGTAGCCGGATCAAGCGTATGCAGCCGCCGC  
ATTGCATCAGCCATGATGGATACTTTCTCGGCAGGAGCAAGGTGTAGATG  
ACATGGAGATCCTGCCCCGGCACTTCGCCCAATAGCAGCCAGTCCCTTCC  
CGCTTCAGTGACAACGTCGAGCACAGCTGCGCAAGGAACGCCCCGTCGTGG  
CCAGCCACGATAGCCGCGCTGCCTCGTCTTGCAAGTTCATTCAGGGCACCG  
GACAGGTTCGGTCTTGACAAAAAGAACCGGGCGCCCCTGCGCTGACAGCCG  
GAACACGGCGGCATCAGAGCAGCCGATTGTCTGTTGTGCCAGTCATAGC  
CGAATAGCCTCTCCACCCAAGCGGCCGGAGAACCTGCGTGCAATCCATCT  
TGTTCAATCATGCGAAACGATCCTCATCCTGTCTCTTGATCAGAGCTTGAT

CCCCTGCGCCATCAGATCCTTGGCGGCGAGAAAGCCATCCAGTTTACTTTG  
CAGGGCTTCCCAACCTTACCAGAGGGGCGCCCCAGCTGGCAATTCCGGTTC  
GCTTGCTGTCCATAAAACCGCCCAGTCTAGCTATCGCCATGTAAGCCCACT  
GCAAGCTACCTGCTTTCTCTTTGCGCTTTCGTTTTCCCTTGTCCAGATAGCC  
CAGTAGCTGACATTCATCCGGGGTCAGCACCGTTTCTGCGGACTGGCTTTC  
TACGTGCTCGAGGGGGGCCAAACGGTCTCCAGCTTGGCTGTTTTGGCGGA  
TGAGAGAAGATTTTCAGCCTGATACAGATTAATCAGAACGCAGAAGCGG  
TCTGATAAAACAGAATTTGCCTGGCGGCAGTAGCGCGGTGGTCCCACCTG  
ACCCCATGCCGAACCTCAGAAGTGAAACGCCGTAGCGCCGATGGTAGTGTG  
GGGTCTCCCATGCGAGAGTAGGGAACTGCCAGGCATCAAATAAAACGA  
AAGGCTCAGTCGAAAGACTGGGCCTTTCGTTTTATCTGTTGTTTGTTCGGTG  
AACGCTCTCCTGAGTAGGACAAATCCGCCGGGAGCGGATTTGAACGTTGC  
GAAGCAACGGCCCGGAGGGTGGCGGGCAGGACGCCCGCCATAAACTGCC  
AGGCATCAAATTAAGCAGAAGGCCATCCTGACGGATGGCCTTTTTGCGTT  
TCTACAAACTCTTTTGTATTTTTCTAAATACATTCAAATATGTATCCGCT  
CATGACCAAAATCCCTTAACGTGAGTTTTTCGTTCCACTGAGCGTCAGACCC  
CGTAGAAAAGATCAAAGGATCTTCTTGAGATCCTTTTTTTCTGCGCGTAAT  
CTGCTGCTTGCAAACAAAAAACCACCGCTACCAGCGGTGGTTTGTTCG  
CGGATCAAGAGCTACCAACTCTTTTTCCGAAGGTAACCTGGCTTCAGCAGA  
GCGCAGATACCAAATACTGTCCTTCTAGTGTAGCCGTAGTTAGGCCACCA  
CTTCAAGAACTCTGTAGCACCGCCTACATACCTCGCTCTGCTAATCCTGTT  
ACCAGTGGCTGCTGCCAGTGGCGATAAGTCGTGTCTTACCGGGTTGGACT  
CAAGACGATAGTTACCGGATAAGGCGCAGCGGTTCGGGCTGAACGGGGGG  
TTCGTGCACACAGCCCAGCTTGGAGCGAACGACCTACACCGAACTGAGAT  
ACCTACAGCGTGAGCTATGAGAAAGCGCCACGCTTCCCGAAGGGAGAAA  
GGCGGACAGGTATCCGGTAAGCGGCAGGGTTCGGAACAGGAGAGCGCACG  
AGGGAGCTTCCAGGGGGAAACGCCTGGTATCTTTATAGTCCTGTCGGGTT  
TCGCCACCTCTGACTTGAGCGTCGATTTTTGTGATGCTCGTCAGGGGGGCG  
GAGCCTATGGAAAAACGCCAGCAACGCGGCCTTTTTACGGTTCCTGGCCT  
TTTGCTGGCCTTTTGCTCACATGTTCTTTCCTGCGTTATCCCCTGATTCTGT

GGATAACCGTATTACCGCCTTTGAGTGAGCTGATACCGCTCGCCGCAGCC  
GAACGACCGAGCGCAGCGAGTCAGTGAGCGAGGAAGCGGAAGAGCGCCT  
GATGCGGTATTTTCTCCTTACGCATCTGTGCGGTATTTACACCCGCATATG  
GTGCACTCTCAGTACAATCTGCTCTGATGCCGCATAGTTAAGCCAGTATAC  
ACTCCGCTATCGCTACGTGACTGGGTCATGGCTGCGCCCCGACACCCGCC  
AACACCCGCTGACGCGCCCTGACGGGCTTGTCTGCTCCCGGCATCCGCTTA  
CAGACAAGCTGTGACCGTCTCCGGGAGCTGCATGTGTCAGAGGTTTTTAC  
CGTCATCACCGAAACGCGCGAGGCAGCAGATCAATTCGCGCGCGAAGGC  
GAAGCGGCATGCATAATGTGCCTGTCAAATGGACGAAGCAGGGATTCTGC  
AAACCCTATGCTACTCCGTCAAGCCGTCAATTGTCTGATTCGTTACCAATT  
ATGACAACCTGACGGCTACATCATTCACTTTTTCTTCACAACCGGCACGGA  
ACTCGCTCGGGCTGGCCCCGGTGCATTTTTTAAATACCCGCGAGAAATAG  
AGTTGATCGTCAAACCAACATTGCGACCGACGGTGGCGATAGGCATCCG  
GGTGGTGCTCAAAGCAGCTTCGCCTGGCTGATACGTTGGTCCTCGCGCC  
AGCTTAAGACGCTAATCCCTAACTGCTGGCGGAAAAGATGTGACAGACGC  
GACGGCGACAAGCAAACATGCTGTGCGACGCTGGCGAT
